# Supplementary material for: Staphylococcus schweitzeri—An Emerging One Health Pathogen?
Source: MDPI journal article supplement (doi:10.3390/microorganisms10040770), 2022-04-02
Supplement: s1 [file s1]

|            |                                                                                                                                           |     |
|------------|-------------------------------------------------------------------------------------------------------------------------------------------|-----|
| DQ507381.1 | -----ATGACAGAATACTTATTAAGTGCTG                                                                                                            | 25  |
| MN166565.1 | ATGAAAATTAACTAAAAAGAAAGAGGTGTAGTTATGACAGAATACTTTTAAAGTGCTG                                                                                | 60  |
| KJ748637.1 | -----ATGACAGAATACTTTTAAAGTGCTG                                                                                                            | 25  |
| KJ748638.1 | -----ATGACAGAATACTTTTAAAGTGCTG                                                                                                            | 25  |
| KJ748639.1 | -----ATGACAGAATACTTTTAAAGTGCTG                                                                                                            | 25  |
| OE998560.1 | -----ATGACAGAATACTTTTAAAGTGCTG                                                                                                            | 25  |
|            | *****                                                                                                                                     |     |
| DQ507381.1 | GCATATGTATGGCAATTGTTTCAATATTACTTATAGGGATGGCTATCAGTAATGTTTCGA                                                                              | 85  |
| MN166565.1 | GCATATTTACGGCAATTGTTTCATTAGTACTTGTAGTGATGGCTATAAGTAAATTTTCTA                                                                              | 120 |
| KJ748637.1 | GCATATTTACGGCAATTGTTTCATTAGTACTTATAGTGAAGGCTATAAGTAAACTTTCTC                                                                              | 85  |
| KJ748638.1 | GCATATTTACGGCAATAGTTTCATTAGTACTTATAGTGATGGCTATAAGTAAACTTTCTC                                                                              | 85  |
| KJ748639.1 | GCATATTTACGGCAATAGTTTCATTAGTACTTATAGTGATGGCTATAAGTAAACTTTCTC                                                                              | 85  |
| OE998560.1 | GCATATTTACGGCAATAGTTTCATTAGTACTTATAGTGATGGCTATAAGTAAATTTTCTC                                                                              | 85  |
|            | *****                                                                                                                                     |     |
| DQ507381.1 | AAGAACAATACGCAAAGAGGTTTTTCTTTTTTCGCTACTAGTTGCTTAGTGTTAACTTTAG                                                                             | 145 |
| MN166565.1 | AAAGGCAAACAGCGAAAAGATTTTTATTTTTCTCTATTAGTTGCTTAGTGTTAACATTAG                                                                              | 180 |
| KJ748637.1 | AAAGGCATACAATGAAAAGATTTTTATTTTTTATCTACTAGTTGCTTAGTGTTAACATTAG                                                                             | 145 |
| KJ748638.1 | AAAGGCAAACCGCGAAAAAATTTTTATTTTTCTCTACTAGTTGCTTATTGTTAACATTAG                                                                              | 145 |
| KJ748639.1 | AAAGGCAAACCGCGAAAAGATTTTTATTTTTTCTCTACTAGTTGCTTAGTGTTAACATTAG                                                                             | 145 |
| OE998560.1 | AAAGGCAAACCGCGAAAAGATTTTTATTTTTTCTCTACTAGTTGCTTAGTGTTAACATTAG                                                                             | 145 |
|            | **        **        *        *        *****        ***        *****        *****        ****                                              |     |
| DQ507381.1 | TTGTAGCTTCAAGTCTAAGTAGCTCAGCAAATGCATCACAAACAGATAATGGCGTAAATA                                                                              | 205 |
| MN166565.1 | TTGTAGTTTCTAATTTTAATCAATCTGCAGGAGCATCCCAACTAACTGATGAAGAG----                                                                              | 236 |
| KJ748637.1 | TTGTAGTTTCTAACTTTAATCAATCTGCAGGAGCTGCTCAACTAGCTGATGAAGAT----                                                                              | 201 |
| KJ748638.1 | TTGTAATTTCTAACTTTAATCAATCTGCAGGAGCTGCCAAACTAGCTGATGAAGAT----                                                                              | 201 |
| KJ748639.1 | TTGTAATTTCTAATTTTAATCAAACCTGCTGGAGCTTCCCAACTAACTGATGAAGAT----                                                                             | 201 |
| OE998560.1 | TTGTAATTTCTAATTTTAATCAAACCTGCTGGAGCTTCCCAACTAACTGATGAAGAT----                                                                             | 201 |
|            | *****        ***        *        *        *        *        *        *        *        *        *                                         |     |
| DQ507381.1 | GAAGTGGTTCTGAAGATCCAACAGTATATAGTGCAACTTCAACTAAAAAATTACATAAAG                                                                              | 265 |
| MN166565.1 | -----GGAAATAGCAATGCAACTGAATACAGTAAATCAGCAACGACTAAATTACATAAAG                                                                              | 291 |
| KJ748637.1 | -----GGAAATAGCAATACAACCTGAATACAGCAAATCAGCAACGACTAAATTACATAAAG                                                                             | 256 |
| KJ748638.1 | -----GGAAATAGCAATACAACCTGAATATAGCAAGTCAGCAACGACTAAATTACATAAAG                                                                             | 256 |
| KJ748639.1 | -----GGAAATAGCAATGCAACTGAATATAGCAAGTCAGCAACGACTAAATTACATAAAG                                                                              | 256 |
| OE998560.1 | -----GGAAATAGCAATGCAACTGAATATAGCAAGTCAGCAACGACTAAATTACATAAAG                                                                              | 256 |
|            | **        *        **        *****        *        ***        **        *        *****        *****                                       |     |
| DQ507381.1 | AACCTGCGACATTAATTTAAAGCGATTGATGGTGATACTGTTAAATTAATGTACAAAGGTC                                                                             | 325 |
| MN166565.1 | AACCTGCGACATTAATTTAAAGCGATCGATGGTGATACGGTTAAGTTAATGTATAAAGGAA                                                                             | 351 |
| KJ748637.1 | AGCCTGCGACATTAATCAAAGCAATTGATGGTGATACTGTTAAGTTAATGTACAAAGGAA                                                                              | 316 |
| KJ748638.1 | AGCCTGCGACATTAATCAAAGCAATTGATGGTGATACTGTTAAGTTAATGTACAAAGGAA                                                                              | 316 |
| KJ748639.1 | AGCCTGCGACATTAATCAAAGCAATTGATGGTGATACTGTTAAGTTAATGTACAAAGGAA                                                                              | 316 |
| OE998560.1 | AGCCTGCGACATTAATCAAAGCAATTGATGGTGATACTGTGAAGTTAATGTACAAAGGAC                                                                              | 316 |
|            | *        *****        *****        *        *****        *****        *****                                                               |     |
| DQ507381.1 | AACCAATGACATTGAGACTATTATTGGTTGATACACCTGAAACAAAGCATCCTAAAAAAG                                                                              | 385 |
| MN166565.1 | AGGCAATGACATTTAGATTGTTATTAATTGATACGCCTGAAACGAAACATCCTAAAAAAG                                                                              | 411 |
| KJ748637.1 | AACCAATGACATTTAGATTGTTATTAATTGATACGCCCGAAACGAAACATCCTAAAAAAG                                                                              | 376 |
| KJ748638.1 | AACCAATGACATTTAGATTGTTATTAATTGATACGCCCGAAACGAAACATCCTAAAAAAG                                                                              | 376 |
| KJ748639.1 | AACCAATGACATTTAGATTGTTATTAATTGATACGCCCGAAACGAAACATCCTAAAAAAG                                                                              | 376 |
| OE998560.1 | AACCAATGACATTTAGATTGTTATTAATTGATACGCCCGAAACGAAACATCCTAAAAAAG                                                                              | 376 |
|            | *        *****        ***        *        *****        *****        *        *****        *****        *****                              |     |
| DQ507381.1 | GTGTAGAGAAATATGGTCCTGAAGCAAGTGCATTTACGAAAAAGATGGTAGAAAATGCAA                                                                              | 445 |
| MN166565.1 | GCGTTGAAAAAATATGGCCCAGAAAGCAAGTGCATTTACGAAGAATATGGTAGAGAATGCTA                                                                            | 471 |
| KJ748637.1 | GCGTTGAAAAAATACGGACCAGAAAGCAAGCGCATTTACGAAAAAATGGTAGAGAATGCTA                                                                             | 436 |
| KJ748638.1 | GCGTTGAAAAAATACGGACCAGAAAGCAAGCGCGTATACGAAAAAATGGTAGAGAATGCTA                                                                             | 436 |
| KJ748639.1 | GCGTTGAAAAAATACGGGCCAGAAAGCAAGCGCGTTTACGAAAAAATGGTAGAGAATGCTA                                                                             | 436 |
| OE998560.1 | GCGTTGAAAAAATATGGACCTGAAGCAAGTGCGTTTACAAAAAATGGTAGAGAATGCTA                                                                               | 436 |
|            | *        *        *        *        *****        *        *        *        *        *        *        *        *                         |     |
| DQ507381.1 | AGAAAATTGAAGTCGAGTTTGACAAAGGTCAAAAGAACTGATAAATATGGACGTGGCTTAG                                                                             | 505 |
| MN166565.1 | AGAAAATAGAAGTGGAATTTGACAAAGGTCAAAAGACAGATAAATATGGACGTGGCTTAG                                                                              | 531 |
| KJ748637.1 | AAAAAATTGAAGTTGAATTTGACAAAGGACAAAAAACTGATAAATATGGACGTGGATTAG                                                                              | 496 |
| KJ748638.1 | AGAAAATTGAAGTTGAATTTGACAAAGGACAAAAAACTGATAAATATGGACGTGGATTAG                                                                              | 496 |
| KJ748639.1 | AGAAAATTGAAGTTGAATTTGACAAAGGACAAAAAACTGATAAATATGGACGTGGATTAG                                                                              | 496 |
| OE998560.1 | AGAAAATTGAAGTTGAATTTGACAAAGGACAAAAAGACAGATAAATATGGACGTGGATTAG                                                                             | 496 |
|            | *        *****        *****        *        *****        *****        *        *****        *****        *****                            |     |
| DQ507381.1 | CGTATATTTATGCTGATGGAAAAATGGTAAACGAAGCTTTAGTTTCGTCAAGGCTTGGCTA                                                                             | 565 |
| MN166565.1 | CTTATATCTATGCTGATGGTAAGATGGTTAACCAAGCTTTAGTGCGTCAAGGTCTAGCAA                                                                              | 591 |
| KJ748637.1 | CTTATATTTATGCAGATGGCAAAATGGTTAATCAAGCGTTAGTACGTCAAGGATTAGCAA                                                                              | 556 |
| KJ748638.1 | CTTATATTTATGCAGATGGTAAATGGTTAACCAAGCATTAGTGCGTCAAGGATTAGCAA                                                                               | 556 |
| KJ748639.1 | CTTATATTTATGCAGATGGCAAAATGGTTAATCAAGCGTTAGTACGTCAAGGATTAGCAA                                                                              | 556 |
| OE998560.1 | CTTATATTTATGCAGATGGTAAATGGTTAACCAAGCATTAGTGCGTCAAGGATTAGCAA                                                                               | 556 |
|            | *        *****        *****        *****        *        *****        *        *****        *****        *****        *        *        * |     |
| DQ507381.1 | AAGTTGCTTATGTTTATAAACCTAACAATACACATGAACAACTTTAAAGAAAAAGTGAAG                                                                              | 625 |
| MN166565.1 | AAGTTGCGTATGTTTATAAACCTAATAACACACATGAACAACATTAAGAAAAAGTGAAG                                                                               | 651 |
| KJ748637.1 | AAGTTGCATATGTATATAAACCTAATAATACACACGAACAACATTAAGGAAAAAGTGAAG                                                                              | 616 |
| KJ748638.1 | AAGTTGCATATGTATATAAACCTAATAATACACATGAACAACACTAAGAAAAAGTGAAG                                                                               | 616 |
| KJ748639.1 | AAGTTGCATATGTATATAAACCTAATAATACACATGAACAACATTAAGGAAAAAGTGAAG                                                                              | 616 |
| OE998560.1 | AAGTTGCATATGTATATAAACCTAATAATACACATGAACAACACTAAGAAAAAGTGAAG                                                                               | 616 |
|            | *****        *****        *****        *        *****        *****        *****        *****        *****                                 |     |
| DQ507381.1 | CACAAGCGAAAAAAGAGAAATTAAATATTT-----                                                                                                       | 655 |
| MN166565.1 | CACAAGCGAAAAAAGAACATTTAAATATTTGGAGTGAAGGTAACGCAGAAATAAGTTACT                                                                              | 711 |
| KJ748637.1 | CACAAGCGAAAAAAGAACATCTAAATATTTGGAGTGAAGGTAACGCAGAAATAAGTTACT                                                                              | 676 |
| KJ748638.1 | CAAAAGCGAAAAAAGAACATCTAAATATTTGGAGTGAAGGTAACGCAGAAATAAGTTACT                                                                              | 676 |
| KJ748639.1 | CACAAGCGAAAAAAGAACATCTAAATATTTGGAGTGAAGGTAACGCAGAAATAA-----                                                                               | 669 |
| OE998560.1 | CACAAGCGAAAAAAGAACATTTAAATATTTGGAGTGAAGGTACGCAGAAATAA-----                                                                                | 669 |
|            | **        *****        *****        *                                                                                                     |     |
| DQ507381.1 | -----                                                                                                                                     | 655 |
| MN166565.1 | GACATTTAACATAAAGTGCCACTGCTGCTAGTGGCACTTTTATAATTTTATAGAT                                                                                   | 765 |
| KJ748637.1 | G-----                                                                                                                                    | 677 |
| KJ748638.1 | G-----                                                                                                                                    | 677 |
| KJ748639.1 | -----                                                                                                                                     | 669 |
| OE998560.1 | -----                                                                                                                                     | 669 |

Supplementary Figure S1: Alignment of *nuc* sequences. Nuc sequences (GeneBank accession numbers in brackets) of *Staphylococcus aureus* (DQ507381.1), *Staphylococcus argenteus* (MN166565.1), *Staphylococcus schweitzeri* (KJ748637.1, KJ748638.1, KJ748639.1) and *Staphylococcus roterodami* (OE998560.1) were aligned using the Clustal Omega multiple alignment tool (<https://www.ebi.ac.uk/Tools/msa/clustalo/>). The primer binding site of the nuc-PCR suggested by Brakstad et al. (J. Clin. Microbiol. 1992) are underlined and shaded in grey.
